# Supplementary material for: High GPER expression in triple-negative breast cancer is linked to pro-metastatic pathways and predicts poor patient outcomes
Source: PubMed Central journal article supplement (PMC9427744; doi:10.1038/s41523-022-00472-4), 2022-08-30
Supplement: 41523_2022_472_MOESM1_ESM.pdf [file 41523_2022_472_MOESM1_ESM.pdf]

*Supplementary Figures*

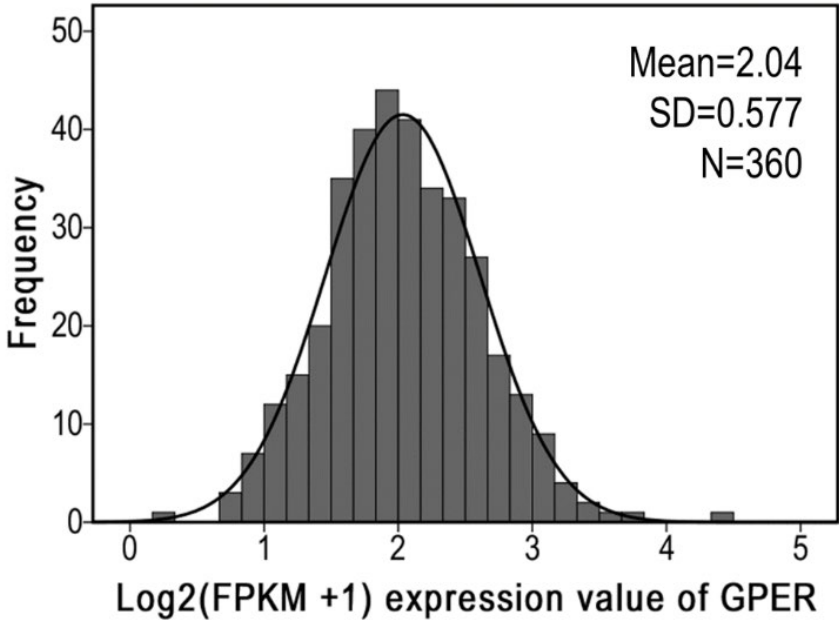

**Supplementary Figure 1.** The log2 (FPKM+1) expression value of GPER at mRNA level met the normal distribution in 360 TNBC tissues.

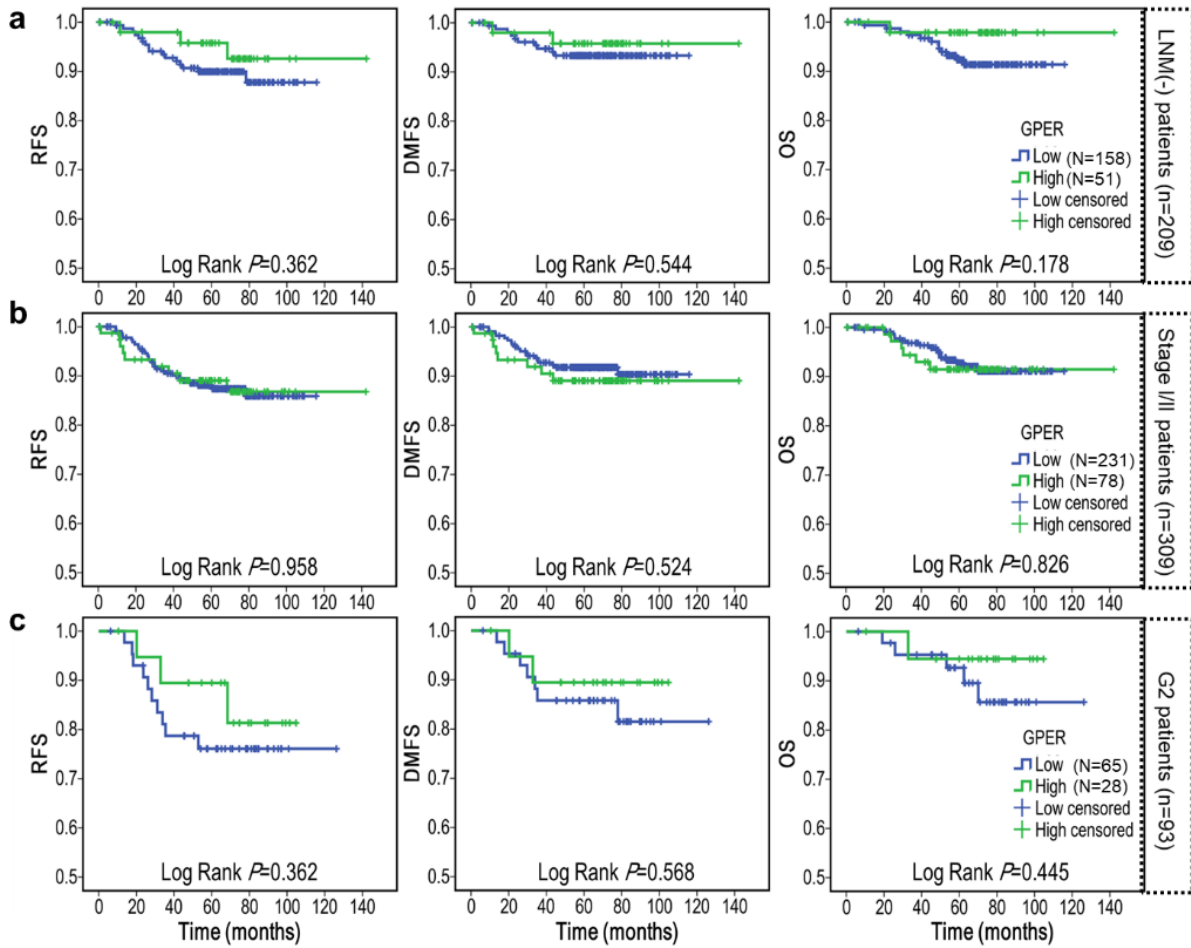

**Supplementary Figure 2.** Kaplan-Meier curves of RFS, DMFS, OS between GPER-low and GPER-high groups in LNM (-) patients, stage I/II patients and G2 tumor patients.
